# Supplementary material
Source: MDPI journal article supplement (https://www.mdpi.com/2076-3417/11/16/7234)
Supplement: s1 [file s1]

# Multi-Lens Array Full-Field X-ray Microscopy

Alexander Opolka <sup>1,\*</sup>, Dominik Müller <sup>2</sup>, Christian Fella <sup>3</sup>, Andreas Balles <sup>3</sup>, Jürgen Mohr <sup>1</sup> and Arndt Last <sup>1,\*</sup>

- <sup>1</sup> Institute of Microstructure Technology (IMT), Karlsruhe Institute of Technology (KIT), Hermann-von-Helmholtz-Platz 1, 76344 Eggenstein-Leopoldshafen, Germany; mohr.sulzfeld@t-online.de  
<sup>2</sup> Chair for X-ray Microscopy (LRM), Julius-Maximilians-Universität Würzburg, 97074 Würzburg, Germany; dominik.mueller@physik.uni-wuerzburg.de  
<sup>3</sup> Fraunhofer Development Center X-ray Technology (EZRT), 90768 Fürth, Germany; christian.fella@iis.fraunhofer.de (C.F.); andreas.balles@iis.fraunhofer.de (A.B.)  
\* Correspondence: phd@opolka.org (A.O.); arndt.last@kit.edu (A.L.)

**Table S1.** Summarized parameters of the used MFCRL.

|                                                                                                      |          |
|------------------------------------------------------------------------------------------------------|----------|
| Number $n$ of CRLs in the array [ $n \times n$ ]                                                     | 9        |
| Photon energy designed for [keV]                                                                     | 9.25     |
| Sample distance from entrance aperture [mm]                                                          | 50       |
| Constant or variable aperture along optical axis?                                                    | variable |
| Image distance from entrance aperture [mm]                                                           | 700      |
| FoV, edge length [ $\mu\text{m}$ ]                                                                   | 100      |
| Entrance aperture, $A_1$ [ $\mu\text{m}$ ]                                                           | 46       |
| Smallest aperture [ $\mu\text{m}$ ]                                                                  | 43.1     |
| Exit aperture [ $\mu\text{m}$ ]                                                                      | 47.9     |
| Minimal distance between two lens elements, orthogonal to optical axis, i.e. $b_1$ [ $\mu\text{m}$ ] | 27       |
| Air gap $a$ between lens elements parallel to optical axis [ $\mu\text{m}$ ]                         | 30       |
| Designed radius in parabola apex, vertically focusing lens elements [ $\mu\text{m}$ ]                | 6.082    |
| Designed radius in parabola apex, horizontally focusing lens elements [ $\mu\text{m}$ ]              | 6.085    |
| Lens elements per dimension, vertically / horizontally focusing                                      | 19 / 20  |
| Total length of CRL [mm]                                                                             | 4.7      |
| Magnification                                                                                        | 13.1     |
| Distance of neighboring images (center to center) [ $\mu\text{m}$ ]                                  | 956      |
| Edge length of one image [ $\mu\text{m}$ ]                                                           | 1310     |

**Table S2.** All aperture sizes of the used MFCRL. The aperture  $A_i$  is the same for lens element  $N_{v,i}$  and  $N_{h,i}$ , i.e. for the  $i$ th vertically and  $i$ th horizontally focusing lens element.

| $i$ th lens element $N_{v/h,i}$ | Aperture $A_i$ [ $\mu\text{m}$ ] |
|---------------------------------|----------------------------------|
| 1                               | 46.00                            |
| 2                               | 45.73                            |
| 3                               | 45.44                            |
| 4                               | 45.14                            |
| 5                               | 44.83                            |
| 6                               | 44.51                            |
| 7                               | 44.17                            |
| 8                               | 43.83                            |
| 9                               | 43.47                            |
| 10                              | 43.10                            |
| 11                              | 43.12                            |
| 12                              | 43.70                            |
| 13                              | 44.26                            |

|     |       |
|-----|-------|
| 14  | 44.81 |
| 15  | 45.35 |
| 16  | 45.88 |
| 17  | 46.39 |
| 18  | 46.90 |
| 19  | 47.39 |
| 20* | 47.87 |

\*only horizontally focusing lens element  $N_{h,20}$  existing.
